# Supplementary material
Source: Springer Nature journal article supplement (https://www.springermedizin.de/resource/supplementary/13098_2014_418_MOESM1_ESM.pdf/9670902)
Supplement: MOESM1 [file 9670902]

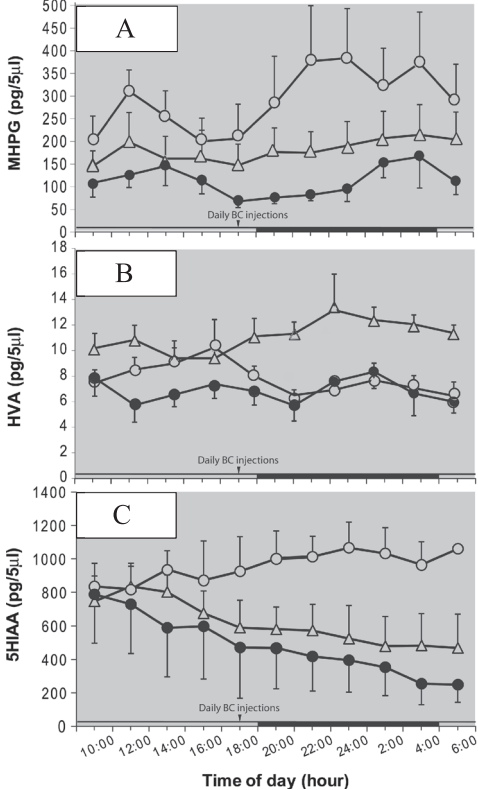

- SHR rats treated with vehicle control
- SHR rats treated with Timed Daily Bromocriptine
- △ Wistar rats
